# Supplementary material for: Holey nickel hydroxide nanosheets for wearable solid-state fiber-supercapacitors
Source: Royal Society of Chemistry journal article supplement (doi:10.1039/c7nr09682h), 2018-01-01
Supplement: c7nr09682h1.pdf [file c7nr09682h1.pdf]

# Supporting Information.

## Holey Nickel Hydroxide Nanosheets for Wearable Solid-State Fiber-Supercapacitor

Peipei Shi,<sup>†,a</sup> Rong Chen,<sup>†,b</sup> Li Li,<sup>a</sup> Jianing An,<sup>c</sup> Li Hua,<sup>a</sup> Jinyuan Zhou,<sup>d</sup> Bin Liu,<sup>\*,b</sup> Peng Chen,<sup>\*,b</sup> Wei Huang<sup>a,c</sup> and Gengzhi Sun<sup>\*,a</sup>

<sup>a</sup>Key Laboratory of Flexible Electronics (KLOFE) & Institute of Advanced Materials (IAM), Jiangsu National Synergetic Innovation Center for Advanced Materials (SICAM), Nanjing Tech University (NanjingTech), 30 South Puzhu Road, Nanjing 211816, P. R. China.

<sup>b</sup>School of Chemical and Biomedical Engineering, Nanyang Technological University, 62 Nanyang Drive, 637459, Singapore.

<sup>c</sup>School of Mechanical and Aerospace Engineering, Nanyang Technological University, 50 Nanyang Avenue, 639798, Singapore.

<sup>d</sup>School of Physical Science and Technology, Lanzhou University, 222 South Tianshui Road, Lanzhou 730000, Gansu, P. R. China.

<sup>e</sup>Shaanxi Institute of Flexible Electronics (SIFE), Northwestern Polytechnical University, 127 West Youyi Road, Xi'an 710072, P. R. China.

<sup>†</sup>These authors contributed equally to this work.

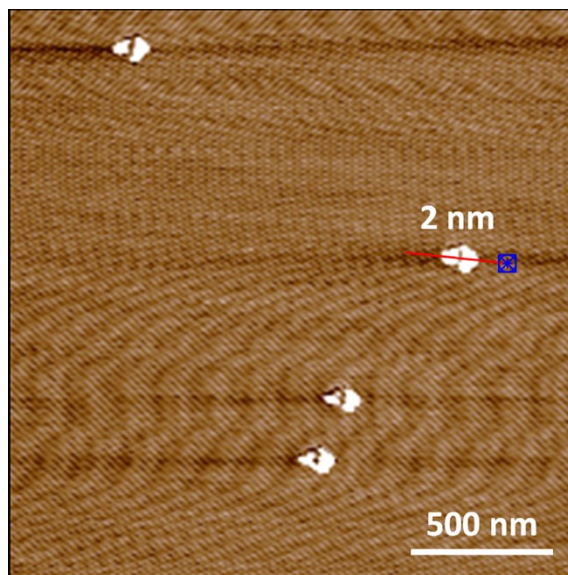

**Fig. S1.** AFM image of Ni(OH)<sub>2</sub> nanosheets.

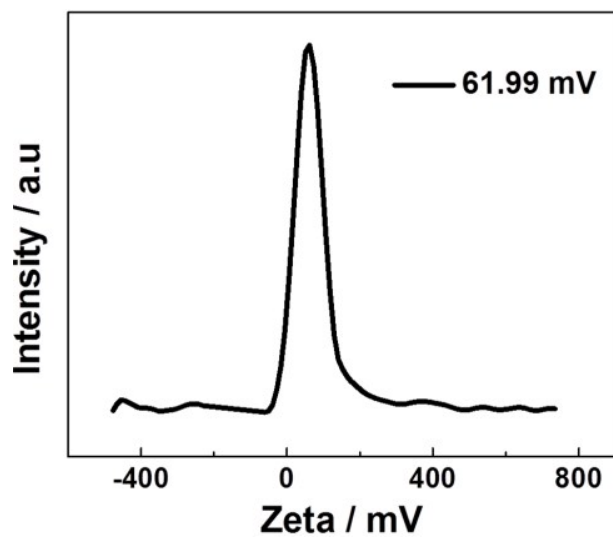

**Fig. S2.** The Zeta potential of Ni(OH)<sub>2</sub> nanosheets that are uniformly dispersed in ethanol at a concentration of 1 mg mL<sup>-1</sup>.

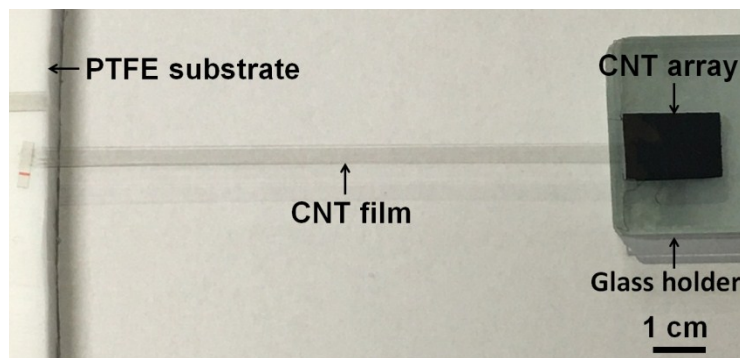

**Fig. S3.** Photograph of a well-aligned CNT film pulled out from vertical CNT array.

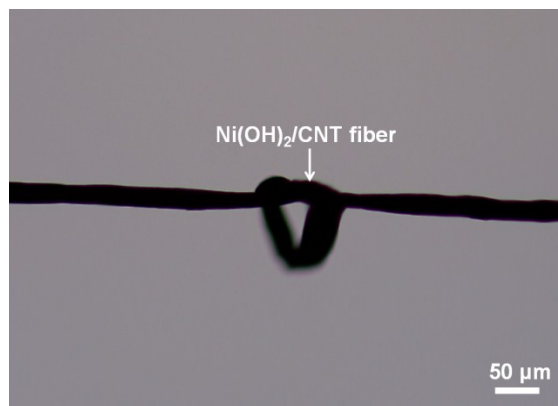

**Fig. S4.** Optical image of a knotted Ni(OH)<sub>2</sub>/CNT fiber.

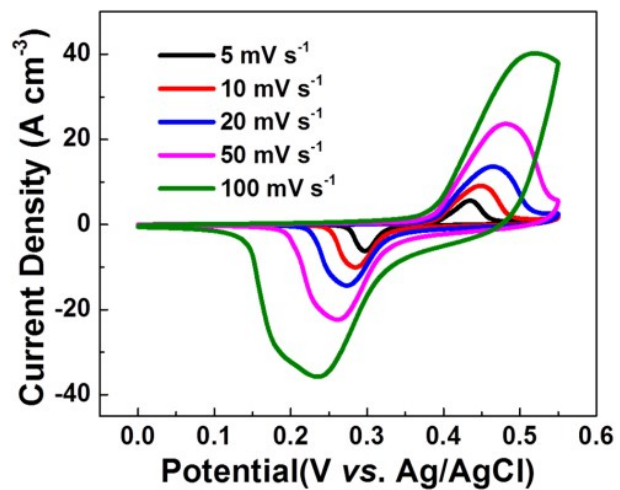

**Fig. S5.** CV curves of Ni(OH)<sub>2</sub>/CNT hybrid fiber electrode (40 wt%) at different scan rates ranging from 5 to 100 mV s<sup>-1</sup> in 1 M KOH.

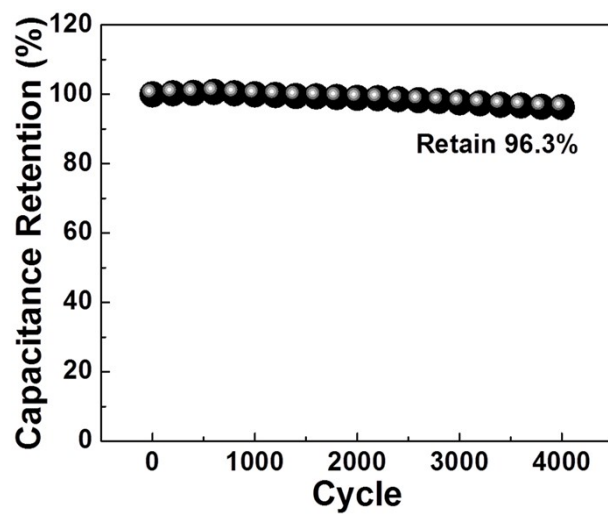

**Fig. S6.** Capacitance retention of the Ni(OH)<sub>2</sub>/CNT fiber electrode after 4000 charge-discharge cycles at a current density of 5.0 A cm<sup>-3</sup>.

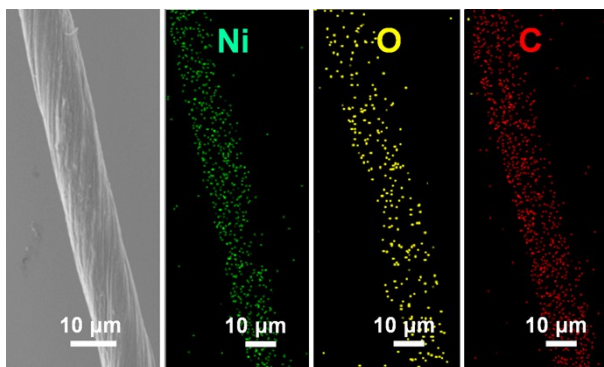

**Fig. S7.** SEM image and EDS mapping of Ni(OH)<sub>2</sub>/CNT fiber after 4000 charge-discharge cycles.



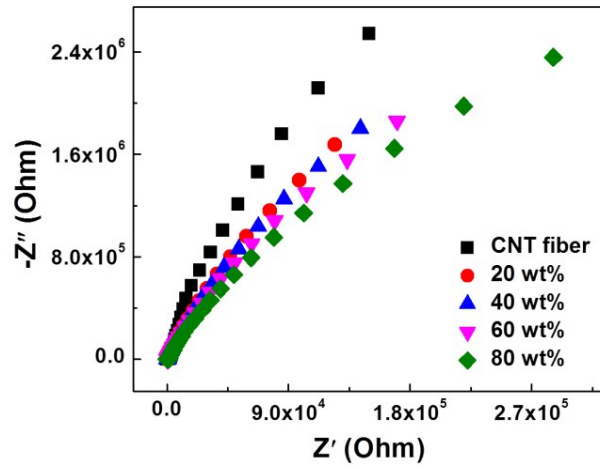

**Fig. S8.** EIS plots of bare CNT fiber and Ni(OH)<sub>2</sub>/CNT hybrid fiber electrodes with different loading amounts of holey Ni(OH)<sub>2</sub> nanosheets (20, 40, 60, and 80 wt%).

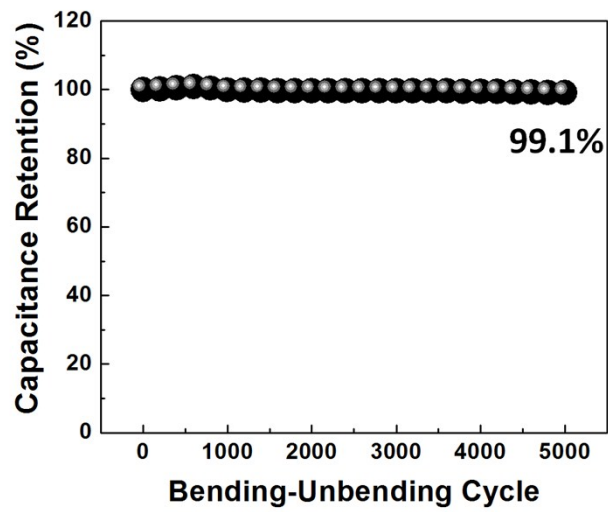

**Fig. S9.** Capacitance retention of the hybrid supercapacitor after 5000 bending-unbending cycles at a current density of  $0.8 \text{ A cm}^{-3}$ .

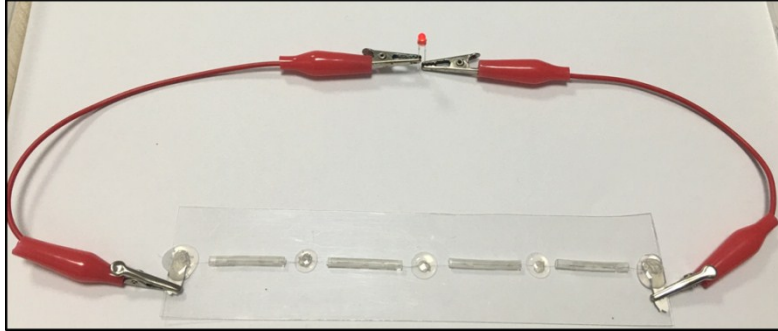

**Fig. S10.** A LED can be lightened up by four hybrid supercapacitors connected in series.
